# Supplementary material for: One Health and Australian Aboriginal and Torres Strait Islander Communities: A One Health Pilot Study
Source: MDPI journal article supplement (doi:10.3390/ijerph20146416), 2023-07-20
Supplement: s1 [file s1]

## Supplementary Material

Supplementary Table S1: Data collection items

| Identifying questions                                                                                                                                                                                                                                                                                |                                                                                                                                                                                                                                                                                                                                           |                                                                                                                                                                                                                                                                                                                                                                                                     |                                                                                                                                                                                                                                                                                                                                                                                                                     |
|------------------------------------------------------------------------------------------------------------------------------------------------------------------------------------------------------------------------------------------------------------------------------------------------------|-------------------------------------------------------------------------------------------------------------------------------------------------------------------------------------------------------------------------------------------------------------------------------------------------------------------------------------------|-----------------------------------------------------------------------------------------------------------------------------------------------------------------------------------------------------------------------------------------------------------------------------------------------------------------------------------------------------------------------------------------------------|---------------------------------------------------------------------------------------------------------------------------------------------------------------------------------------------------------------------------------------------------------------------------------------------------------------------------------------------------------------------------------------------------------------------|
| House address and community?<br>Free response<br>Do Aboriginal and/or Torres Strait Islander people live in this household?<br>Yes, No, Undisclosed                                                                                                                                                  |                                                                                                                                                                                                                                                                                                                                           |                                                                                                                                                                                                                                                                                                                                                                                                     |                                                                                                                                                                                                                                                                                                                                                                                                                     |
| Human health                                                                                                                                                                                                                                                                                         | Animal health                                                                                                                                                                                                                                                                                                                             | Environmental health                                                                                                                                                                                                                                                                                                                                                                                | One Health concept                                                                                                                                                                                                                                                                                                                                                                                                  |
| <p>How many people live in the household?<br/>1-10+ people</p> <p>How many bedrooms does the household have?<br/>1-5+ bedrooms<br/>Don't know</p> <p>Is the household crowded?<br/>Yes a lot<br/>Yes a fair bit<br/>Yes a little bit<br/>No<br/>Don't know</p>                                       | <p>Animal health assessments:<br/>Species (dog or cat)<br/>Breed<br/>Size<br/>Sex<br/>Age group<br/>Desexing status<br/>Body condition score<br/>Hair score<br/>Tick and flea score<br/>Other problems<br/>Treatments delivered</p>                                                                                                       | <p>Do you have any concerns with your household environment? If yes, what?<br/>Water supply/quality<br/>Containing animals (fencing)<br/>Yard maintenance (grass)<br/>Animal mess (carcasses/faeces)<br/>Waste management (rubbish)<br/>Washing and hygiene facilities<br/>Pests (rodents, insects, parasites)<br/>Wild animals (horses)<br/>Power supply/electricity<br/>Other (free response)</p> | <p>Do animals affect the health of people living in your household?<br/>Yes a lot<br/>Yes a fair bit<br/>Yes a little bit<br/>No<br/>Don't know</p> <p>If yes, how?<br/>Itchy animals make people itchy<br/>Sick animals make people sick<br/>Injury from animals (bites, scratches)<br/>Affects wellbeing (sad when animals are sick or injured)<br/>Don't know<br/>Other (free response)</p>                      |
| <p>Are you worried about the health of your animals?<br/>Yes a lot<br/>Yes a fair bit<br/>Yes a little bit<br/>No<br/>Don't know</p> <p>If yes, what are your concerns?<br/>Disease<br/>Injury<br/>Too many animals<br/>Can't access animal health care<br/>Don't know<br/>Other (free response)</p> | <p>Does the community need animal health care?<br/>If yes, what?<br/>Vet based in community<br/>Vet visiting the community<br/>Animal medicines available<br/>Community animal health workers<br/>Regular and ongoing program<br/>Don't need animal health care<br/>Controlling wild animals<br/>Don't know<br/>Other (free response)</p> |                                                                                                                                                                                                                                                                                                                                                                                                     | <p>Does the environment affect the health of people living in your household?<br/>Yes a lot<br/>Yes a fair bit<br/>Yes a little bit<br/>No<br/>Don't know</p> <p>If yes, how?<br/>Impacts of wild animals (horses, pigs etc.)<br/>Affects health of people<br/>Affects health of dogs and cats<br/>Weather events (storms, fires, floods)<br/>Impact of climate change<br/>Don't know<br/>Other (free response)</p> |

Supplementary Table S2: Exposure and outcome variables

| Human health (exposures)   |                                                                                                    | Environmental health (exposures) |                                                                                              | Animal health (outcomes)   |                                                                                                                |
|----------------------------|----------------------------------------------------------------------------------------------------|----------------------------------|----------------------------------------------------------------------------------------------|----------------------------|----------------------------------------------------------------------------------------------------------------|
| <i>Variable</i>            | <i>Options</i>                                                                                     | <i>Variable</i>                  | <i>Options</i>                                                                               | <i>Variable</i>            | <i>Options</i>                                                                                                 |
| Household crowding         | >2 people per bedroom per household (crowded)<br>≤2 people per bedroom per household (not crowded) | Household environmental concerns | Concerns with household environment (at least one concern)<br>No concerns (no)               | Body condition score (BCS) | Unhealthy BCS (thin BCS 1-3 and overweight BCS 7-9)<br>Healthy BCS (BCS 4-6)                                   |
| Perceived crowding         | Crowded (yes to feels crowded)<br>Not crowded (no)                                                 | Animal crowding                  | Animal crowding (>4 animals per household)<br>No animal crowding (1-4 animals per household) | Hair score                 | Unhealthy hair score (hair score 2-6)<br>Healthy hair score (hair score 1)                                     |
| Concerns for animal health | Concerns for animal health (yes to has concerns)<br>No concerns (no)                               | Animal breeding                  | Breeding (puppies and/or kittens present)<br>No breeding (no litters)                        | Tick and flea score        | Unhealthy tick and flea score (tick and flea score 2-4)<br>Healthy tick and flea score (tick and flea score 1) |

Supplementary Table S3: Fisher's exact test

| Healthy BCS                            |                                |                                 |       |                                  |
|----------------------------------------|--------------------------------|---------------------------------|-------|----------------------------------|
|                                        | Unhealthy BCS<br>O (E)*        | Healthy BCS<br>O (E)*           | Total | Fisher's exact test<br>(p-value) |
| Human health exposures                 |                                |                                 |       |                                  |
| >2 people per bedroom<br>per household | 1 (0.8)                        | 5 (5.2)                         | 6     | 1.00                             |
| ≤2 people per bedroom<br>per household | 6 (6.2)                        | 42 (41.8)                       | 48    |                                  |
| Total                                  | 7                              | 47                              | 54    |                                  |
|                                        |                                |                                 |       |                                  |
| Perceived crowding                     | 1 (1.7)                        | 12 (11.3)                       | 13    | 1.00                             |
| No crowding                            | 6 (5.3)                        | 35 (35.7)                       | 41    |                                  |
| Total                                  | 7                              | 47                              | 54    |                                  |
|                                        |                                |                                 |       |                                  |
| Concerns for animal<br>health          | 5 (3.8)                        | 25 (26.2)                       | 30    | 0.44                             |
| No concerns                            | 2 (3.2)                        | 23 (21.8)                       | 25    |                                  |
| Total                                  | 7                              | 48                              | 55    |                                  |
| Environmental health exposures         |                                |                                 |       |                                  |
| Household concerns                     | 7 (6.3)                        | 43 (43.8)                       | 50    | 1.00                             |
| No concerns                            | 0 (0.8)                        | 6 (5.3)                         | 6     |                                  |
| Total                                  | 7                              | 49                              | 56    |                                  |
|                                        |                                |                                 |       |                                  |
| Animal crowding                        | 1 (2.0)                        | 15 (14.0)                       | 16    | 0.66                             |
| No animal crowding                     | 6 (5.0)                        | 34 (35.0)                       | 40    |                                  |
| Total                                  | 7                              | 49                              | 56    |                                  |
|                                        |                                |                                 |       |                                  |
| Animal breeding                        | 0 (1.0)                        | 8 (7.0)                         | 8     | 0.58                             |
| No breeding                            | 7 (6.0)                        | 41 (42.0)                       | 48    |                                  |
| Total                                  | 7                              | 49                              | 56    |                                  |
| Healthy hair score                     |                                |                                 |       |                                  |
|                                        | Unhealthy hair<br>score O (E)* | Healthy hair<br>score<br>O (E)* | Total | Fisher's exact test<br>(p-value) |
| Human health exposures                 |                                |                                 |       |                                  |
| >2 people per bedroom<br>per household | 3 (1.0)                        | 3 (5.0)                         | 6     | 0.05                             |
| ≤2 people per bedroom<br>per household | 5 (7.0)                        | 36 (34.0)                       | 41    |                                  |
| Total                                  | 8                              | 39                              | 47    |                                  |
|                                        |                                |                                 |       |                                  |
| Perceived crowding                     | 2 (1.9)                        | 9 (9.1)                         | 11    | 1.00                             |
| No crowding                            | 6 (6.1)                        | 30 (29.9)                       | 36    |                                  |
| Total                                  | 8                              | 39                              | 47    |                                  |
|                                        |                                |                                 |       |                                  |
| Concerns for animal<br>health          | 5 (4.5)                        | 22 (22.5)                       | 27    | 1.00                             |
| No concerns                            | 3 (3.5)                        | 18 (17.5)                       | 21    |                                  |

|                                     |                                      |                                    |       |                               |
|-------------------------------------|--------------------------------------|------------------------------------|-------|-------------------------------|
| Total                               | 8                                    | 40                                 | 48    |                               |
| Environmental health exposures      |                                      |                                    |       |                               |
| Household concerns                  | 7 (7.0)                              | 36 (36.0)                          | 43    | 1.00                          |
| No concerns                         | 1 (1.0)                              | 5 (5.0)                            | 6     |                               |
| Total                               | 8                                    | 41                                 | 49    |                               |
|                                     |                                      |                                    |       |                               |
| Animal crowding                     | 2 (2.4)                              | 13 (12.6)                          | 15    | 1.00                          |
| No animal crowding                  | 6 (5.6)                              | 28 (28.4)                          | 34    |                               |
| Total                               | 8                                    | 41                                 | 49    |                               |
|                                     |                                      |                                    |       |                               |
| Animal breeding                     | 1 (1.3)                              | 7 (6.7)                            | 8     | 1.00                          |
| No breeding                         | 7 (6.7)                              | 34 (34.3)                          | 41    |                               |
| Total                               | 8                                    | 41                                 | 49    |                               |
| Healthy tick and flea scores        |                                      |                                    |       |                               |
|                                     | Unhealthy tick and flea score O (E)* | Healthy tick and flea score O (E)* | Total | Fisher's exact test (p-value) |
| Human health exposures              |                                      |                                    |       |                               |
| >2 people per bedroom per household | 2 (1.4)                              | 3 (3.6)                            | 5     | 0.60                          |
| ≤2 people per bedroom per household | 10 (10.6)                            | 29 (28.4)                          | 39    |                               |
| Total                               | 12                                   | 32                                 | 44    |                               |
|                                     |                                      |                                    |       |                               |
| Perceived crowding                  | 2 (2.7)                              | 8 (7.3)                            | 10    | 0.70                          |
| No crowding                         | 10 (9.3)                             | 24 (24.7)                          | 34    |                               |
| Total                               | 12                                   | 32                                 | 44    |                               |
|                                     |                                      |                                    |       |                               |
| Concerns for animal health          | 9 (6.4)                              | 15 (17.6)                          | 24    | 0.10                          |
| No concerns                         | 3 (5.6)                              | 18 (15.4)                          | 21    |                               |
| Total                               | 12                                   | 33                                 | 45    |                               |
| Environmental health exposures      |                                      |                                    |       |                               |
| Household concerns                  | 12 (11.3)                            | 28 (28.7)                          | 40    | 0.66                          |
| No concerns                         | 1 (1.7)                              | 5 (4.3)                            | 6     |                               |
| Total                               | 13                                   | 33                                 | 46    |                               |
|                                     |                                      |                                    |       |                               |
| Animal crowding                     | 2 (4.0)                              | 12 (10.0)                          | 14    | 0.29                          |
| No animal crowding                  | 11 (9.0)                             | 21 (23.0)                          | 32    |                               |
| Total                               | 13                                   | 33                                 | 46    |                               |
|                                     |                                      |                                    |       |                               |
| Animal breeding                     | 2 (2.3)                              | 6 (5.7)                            | 8     | 1.00                          |
| No breeding                         | 11 (10.7)                            | 27 (27.3)                          | 38    |                               |
| Total                               | 13                                   | 33                                 | 46    |                               |

\* O: Observed frequency; E: Expected frequency

Supplementary Table S4: One Health at household level

| Questions                                                                         | Number (N) | Percentage (%) |
|-----------------------------------------------------------------------------------|------------|----------------|
| <b>Do Aboriginal and/or Torres Strait Islander people live in this household?</b> |            |                |
| Yes                                                                               | 81         | 98.8           |
| No                                                                                | 1          | 1.2            |
| Missing                                                                           | 0          | 0.0            |
| Total                                                                             | 82         | 100.0          |
| <i>One Health concept</i>                                                         |            |                |
| <b>Do animals affect the health of people living in your household?</b>           |            |                |
| No                                                                                | 38         | 46.3           |
| Yes                                                                               | 34         | 41.5           |
| Don't know                                                                        | 1          | 1.2            |
| Missing                                                                           | 9          | 11.0           |
| Total                                                                             | 82         | 100.0          |
| <b>If yes, how? (can choose multiple options)</b>                                 |            |                |
| Itchy animals make people itchy                                                   | 9          | 11.0           |
| Sick animals make people sick                                                     | 12         | 14.6           |
| Injury from animals (bites, scratches                                             | 4          | 4.9            |
| Affects wellbeing (sad when animals are sick or injured)                          | 13         | 15.8           |
| Other (comments)                                                                  | 26         | 31.7           |
| <b>Does the environment affect the health of people living in your household?</b> |            |                |
| No                                                                                | 24         | 29.3           |
| Yes                                                                               | 19         | 23.2           |
| Don't know                                                                        | 3          | 3.7            |
| Missing                                                                           | 36         | 43.9           |
| Total                                                                             | 82         | 100.0          |
| <b>If yes, how? (can choose multiple options)</b>                                 |            |                |
| Impacts of wild animals (horses, pigs etc.)                                       | 3          | 3.7            |
| Affects health of people                                                          | 6          | 7.3            |
| Affects health of dogs and cats                                                   | 1          | 1.2            |
| Impact of climate change                                                          | 3          | 3.7            |
| Don't know                                                                        | 2          | 2.4            |
| Other (comments)                                                                  | 17         | 20.7           |
| <i>Human Health</i>                                                               |            |                |
| <b>How many people live in the household?</b>                                     |            |                |
| 1-2                                                                               | 16         | 19.5           |
| 3-4                                                                               | 26         | 31.7           |
| 5-6                                                                               | 17         | 20.7           |
| 7-8                                                                               | 13         | 15.8           |
| 9+                                                                                | 9          | 11.0           |
| Missing                                                                           | 1          | 1.2            |
| Total                                                                             | 82         | 100.0          |
| <b>How many bedrooms does the household have?</b>                                 |            |                |
| 1                                                                                 | 1          | 1.2            |
| 2                                                                                 | 13         | 15.8           |
| 3                                                                                 | 22         | 26.8           |
| 4                                                                                 | 32         | 39.0           |
| 5+                                                                                | 10         | 12.2           |
| Don't know                                                                        | 1          | 1.2            |

|                                                                      |    |       |
|----------------------------------------------------------------------|----|-------|
| Missing                                                              | 3  | 3.7   |
| Total                                                                | 82 | 100.0 |
| <b>Crowding</b>                                                      |    |       |
| Not crowded ( $\leq 2$ people per bedroom per household)             | 68 | 82.9  |
| Crowded ( $> 2$ people per bedroom per household)                    | 11 | 13.4  |
| Missing                                                              | 3  | 3.7   |
| Total                                                                | 82 | 100.0 |
| <b>Is the household crowded?</b>                                     |    |       |
| No                                                                   | 61 | 74.4  |
| Yes                                                                  | 17 | 20.7  |
| Don't know                                                           | 1  | 1.2   |
| Missing                                                              | 3  | 3.7   |
| Total                                                                | 82 | 100.0 |
| <b>Are you worried about the health of your animals?</b>             |    |       |
| No                                                                   | 37 | 45.1  |
| Yes                                                                  | 43 | 52.4  |
| Missing                                                              | 2  | 2.4   |
| Total                                                                | 82 | 100.0 |
| <b>If yes, what are your concerns? (can choose multiple options)</b> |    |       |
| Disease                                                              | 25 | 30.5  |
| Injury                                                               | 9  | 11.0  |
| Too many animals                                                     | 5  | 6.1   |
| Other (comments)                                                     | 38 | 46.3  |
| <b>Environmental health</b>                                          |    |       |
| <b>Do you have any concerns with your household environment?</b>     |    |       |
| Yes                                                                  | 71 | 86.6  |
| No                                                                   | 11 | 13.4  |
| Total                                                                | 82 | 100.0 |
| <b>If yes, what? (can choose multiple options)</b>                   |    |       |
| Water and power supply/quality                                       | 7  | 8.5   |
| Containing animals (fencing)                                         | 47 | 57.3  |
| Yard and rubbish management                                          | 4  | 4.9   |
| Animal mess (carcasses/faeces)                                       | 11 | 13.4  |
| Washing and hygiene facilities                                       | 1  | 1.2   |
| Pests (rodents, insects, parasites)                                  | 52 | 63.4  |
| Wild animals (horses)                                                | 24 | 29.3  |
| Other (comments)                                                     | 61 | 74.4  |
| <b>Household owns cats and dogs</b>                                  |    |       |
| Yes                                                                  | 67 | 81.7  |
| No                                                                   | 15 | 18.3  |
| Total                                                                | 82 | 100.0 |
| <b>Cats and dogs per house</b>                                       |    |       |
| 0                                                                    | 15 | 18.3  |
| 1-4                                                                  | 48 | 58.5  |
| 5-8                                                                  | 14 | 17.1  |
| 9-12                                                                 | 5  | 6.1   |
| Total                                                                | 82 | 100.0 |
| <b>Litters present</b>                                               |    |       |
| Puppies or kittens present                                           | 8  | 11.9  |

|                                                                                                |     |       |
|------------------------------------------------------------------------------------------------|-----|-------|
| No litters                                                                                     | 59  | 88.1  |
| Total                                                                                          | 67* | 100.0 |
| <b>Animal health</b>                                                                           |     |       |
| <b>Body condition score household average</b>                                                  |     |       |
| Thin (BCS 1-3)                                                                                 | 3   | 4.5   |
| Ideal (BCS4-6)                                                                                 | 49  | 73.1  |
| Overweight (BCS 7-9)                                                                           | 4   | 6.0   |
| Missing                                                                                        | 11  | 16.4  |
| Total*                                                                                         | 67* | 100.0 |
| <b>Hair score household average</b>                                                            |     |       |
| No hair loss (full coat)                                                                       | 41  | 61.2  |
| Up to 20% hair loss                                                                            | 8   | 11.9  |
| Missing                                                                                        | 18  | 26.9  |
| Total*                                                                                         | 67* | 100.0 |
| <b>Tick score household average</b>                                                            |     |       |
| No ticks                                                                                       | 35  | 52.2  |
| Mild ticks                                                                                     | 9   | 13.4  |
| Moderate ticks                                                                                 | 1   | 1.5   |
| Missing                                                                                        | 22  | 32.8  |
| Total*                                                                                         | 67* | 99.9  |
| <b>Flea score household average</b>                                                            |     |       |
| No fleas                                                                                       | 36  | 53.7  |
| Mild fleas                                                                                     | 7   | 10.5  |
| Missing                                                                                        | 24  | 35.8  |
| Total*                                                                                         | 67* | 100.0 |
| <b>Does the community need animal health care? If yes, what? (can choose multiple options)</b> |     |       |
| Vet based in community                                                                         | 12  | 14.6  |
| Vet visiting the community                                                                     | 33  | 40.2  |
| Animal medicines available                                                                     | 42  | 51.2  |
| Community animal health workers                                                                | 5   | 6.1   |
| Regular and ongoing program                                                                    | 26  | 31.7  |
| Don't need animal health care                                                                  | 2   | 2.4   |
| Controlling wild animals                                                                       | 3   | 3.7   |
| Don't know                                                                                     | 2   | 2.4   |
| Other (comments)                                                                               | 66  | 80.5  |

\* Households with no animals excluded
